# Supplementary material for: Promoting interfacial charge transfer by B/N co-doping enables efficient ORR catalysis of carbon-encapsulated Fe2N
Source: Royal Society of Chemistry journal article supplement (doi:10.1039/d1ta10352k), 2022-01-01
Supplement: d1ta10352k1.pdf [file d1ta10352k1.pdf]

## **Promoting interfacial charge transfer by B/N co-doping enable efficient ORR catalysis of carbon encapsulating Fe<sub>2</sub>N**

Zhi Xie <sup>a</sup>, Qiaoling Li <sup>a,b</sup>, Xingkai Peng <sup>a</sup>, Xuwei Wang <sup>a</sup>, Lingli Guo <sup>a</sup>, Xinghua Zhang <sup>a</sup>, Zunming Lu <sup>a</sup>, Xiaojing Yang <sup>a</sup>, Xiaofei Yu <sup>a</sup>, Lanlan Li <sup>a,\*</sup>

<sup>a</sup> School of Materials Science and Engineering, Hebei University of Technology, Tianjin 300130, China

<sup>b</sup> School of Materials Science and Engineering, Shandong University of Technology, Zibo 255000, China

\*Corresponding Author. *E-mail addresses*: liabc@hebut.edu.cn (L. Li).

## Supporting information

### Electrochemical Measurements

In the process of cyclic voltammetry (CV) tests, the KOH electrolyte should be bubbled with N<sub>2</sub> or O<sub>2</sub> flow to achieve an oxygen-free or oxygen-saturated environment. For each working electrode test, 20 cycle CVs with a scan rate of 50 mV s<sup>-1</sup> were accomplished to make it stable. The polarization curves, which were carried out in O<sub>2</sub>-saturated 0.1 M KOH solution, were scanned cathodically from 1.1 to 0.2 V at a scan rate of 5 mV s<sup>-1</sup> with varying rotating speed from 400 rpm to 2025 rpm. The electron transfer number (n) and kinetic current density (J<sub>k</sub>) were determined according to the Koutecky–Levich equation:

$$\frac{1}{J} = \frac{1}{J_k} + \frac{1}{J_L} = \frac{1}{J_k} + \frac{1}{B\omega^{1/2}} \quad (1)$$

$$B = 0.20nFC_0D_0^{2/3}\nu^{-1/6} \quad (2)$$

$$J_k = nFkC_0 \quad (3)$$

where J represent the measured electricity density, J<sub>k</sub> is the Kinetic density and J<sub>L</sub> is the diffusion-limited current density. Besides, F, C<sub>0</sub>, D<sub>0</sub>, ν, k, and ω are the Faraday constant (96,485 C mol<sup>-1</sup>), the saturation concentration of O<sub>2</sub> in the 0.1M KOH electrolyte (C<sub>0</sub>=1.26×10<sup>-6</sup> mol cm<sup>-3</sup>), the O<sub>2</sub> diffusion coefficient (1.9×10<sup>5</sup> cm<sup>2</sup> s<sup>-1</sup>), the solution viscosity (0.01 cm<sup>2</sup> s<sup>-1</sup>), the electron-transfer rate constant and the rotation speed of the electrode (rad s<sup>-1</sup>) respectively.

For the rotating ring disk electrode (RRDE) measurement, the working electrodes were prepared by the same method as the RDE. The peroxide percentage (H<sub>2</sub>O<sub>2</sub>%, which serves as 2e<sup>-</sup> pathway selectivity) and electron transfer number (n) were

calculated by the followed equations:

$$H_2O_2\% = 200 \times \frac{I_r/N}{I_d+I_r/N} \quad (4)$$

$$n = 4 \times \frac{I_d}{I_d+I_r/N} \quad (5)$$

Where  $I_d$  is the disk current,  $I_r$  is the ring current, and  $N$  is current collection efficiency of the Pt ring ( $N = 0.37$ , provided by the manufacturer).

## Supporting Figures

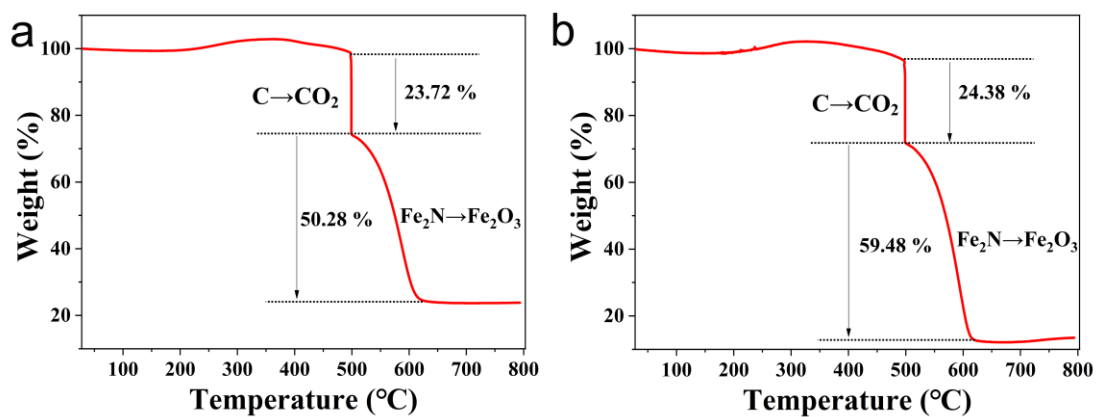

**Fig. S1** TGA curves of Fe<sub>2</sub>N@BNC-2 (a) and Fe<sub>2</sub>N@NC (b) under Air atmosphere from 25 to 800 °C with a heating rate of 10 °C min<sup>-1</sup>.

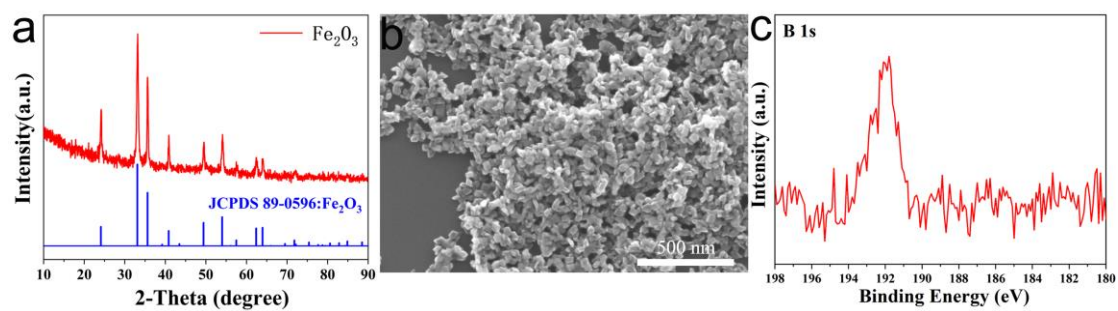

**Fig. S2** XRD patterns (a) and SEM image (b) of boron-containing Fe<sub>2</sub>O<sub>3</sub> by hydrothermal. (c) B 1s XPS spectra of boron-containing Fe<sub>2</sub>O<sub>3</sub>.

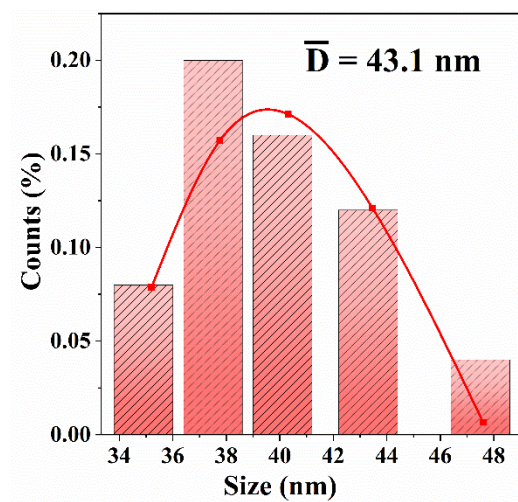

**Fig. S3** The size distribution of Fe<sub>2</sub>N@BNC-2.

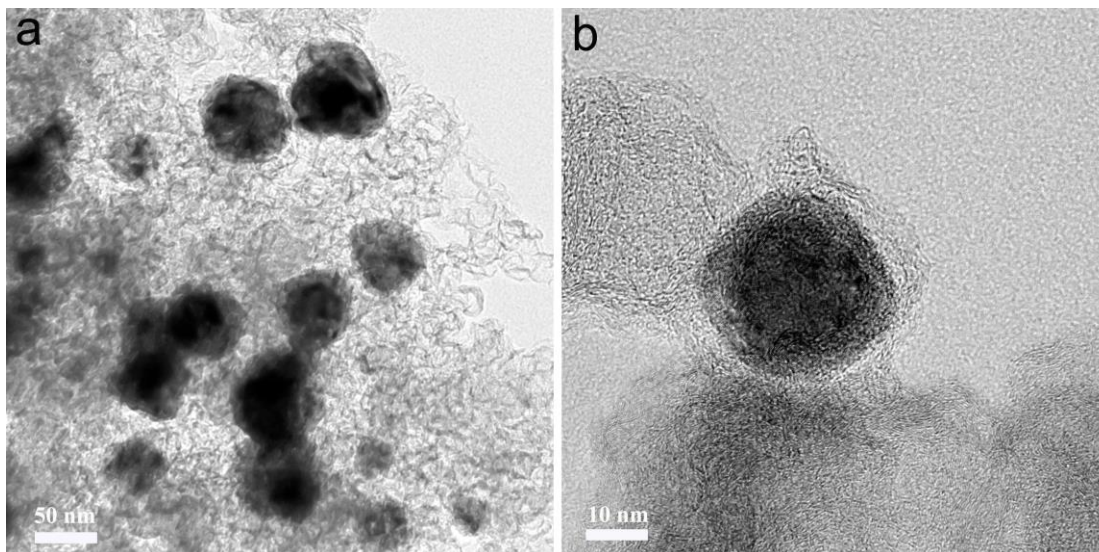

**Fig. S4** (a) TEM image of Fe<sub>2</sub>N@NC. (b) HRTEM image of Fe<sub>2</sub>N@NC

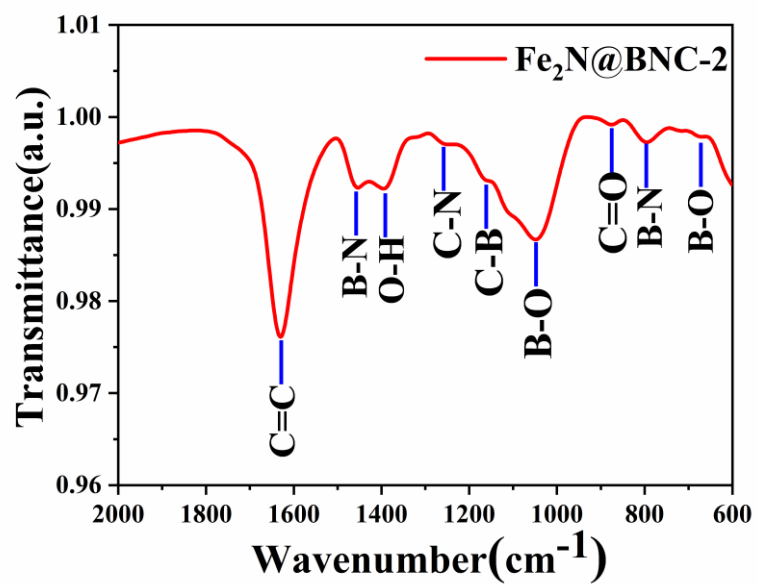

**Fig. S5** FTIR spectrum of the Fe<sub>2</sub>N@BNC-2.

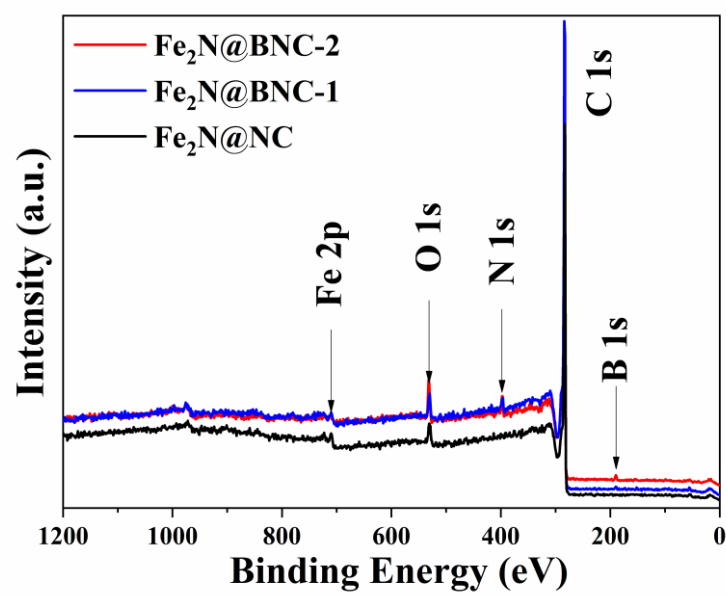

**Fig. S6** XPS survey spectra of the various obtained materials.

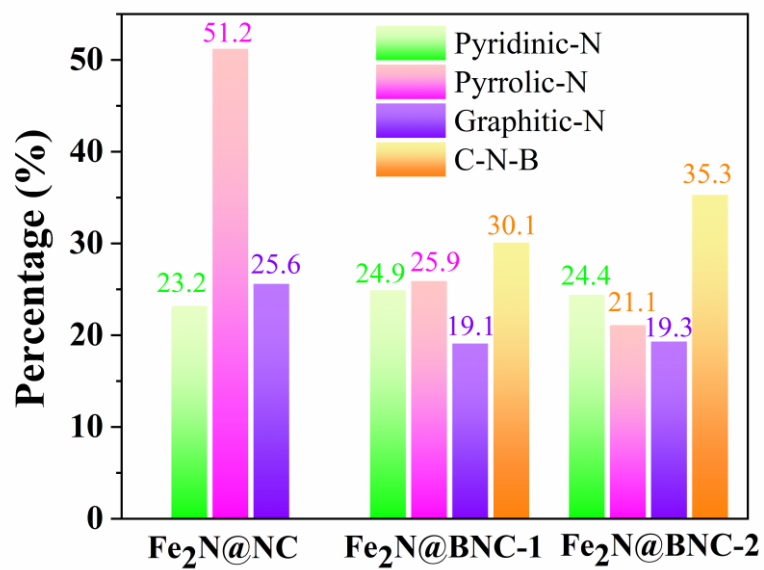

**Fig. S7** N bonding configurations and the corresponding contents in Fe<sub>2</sub>N@BNC-2, Fe<sub>2</sub>N@BNC-1 and Fe<sub>2</sub>N@NC.

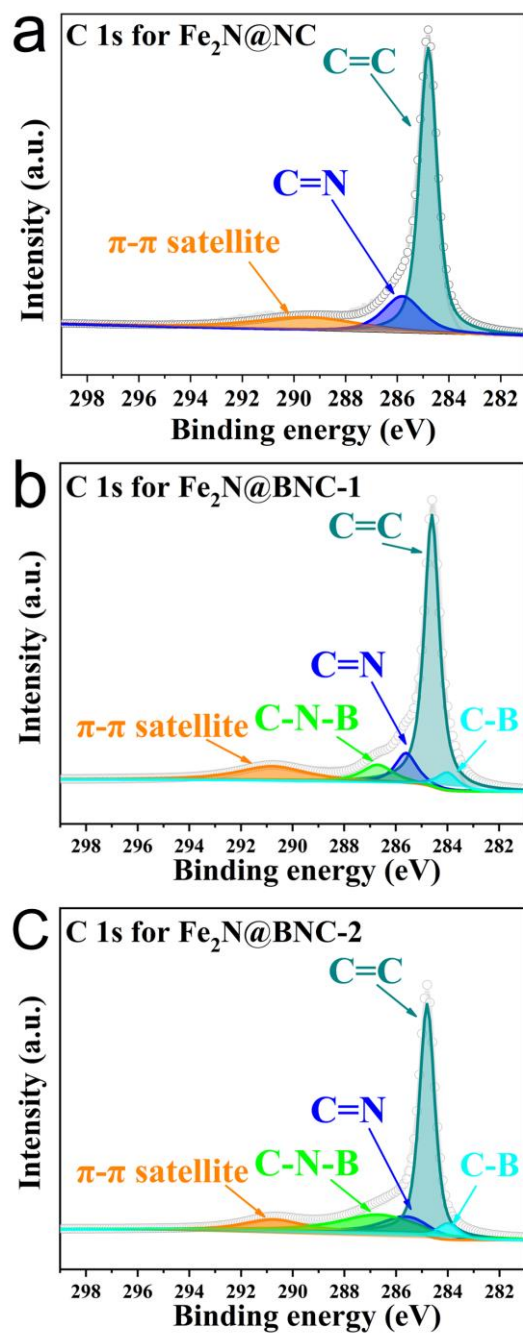

**Fig. S8** XPS spectra of C 1s of the  $\text{Fe}_2\text{N@NC}$  (a),  $\text{Fe}_2\text{N@BNC-1}$  (b) and  $\text{Fe}_2\text{N@BNC-2}$  (c).

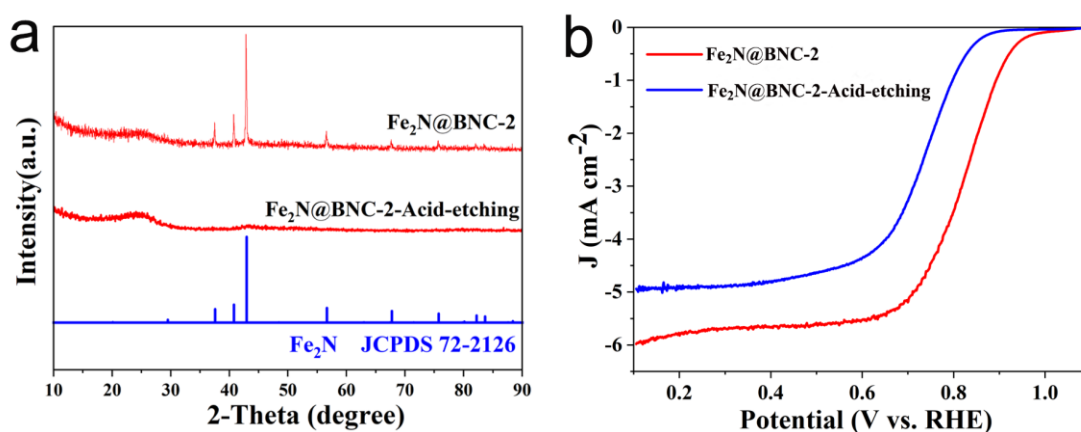

**Fig. S9** (a) The XRD of Fe<sub>2</sub>N@BNC-2 before and after the removal of Fe<sub>2</sub>N. (b) The LSV of Fe<sub>2</sub>N@BNC-2 before and after the removal of Fe<sub>2</sub>N.

The method is to place the ground sample (Fe<sub>2</sub>N@BNC-2) in 2M HCl, pickling at 60°C for 12h. After centrifugation, washed and dried, as-obtained powder was denoted as Fe<sub>2</sub>N@BNC-2-acid. As shown in Fig. S9a, the Fe<sub>2</sub>N diffraction peak of the Fe<sub>2</sub>N@BNC-2 disappeared, only the diffraction peak of the C (002), which indicates that the Fe<sub>2</sub>N in the sample was successfully removed after the acid treatment. In Fig. S9b, Fe<sub>2</sub>N@NC-2-acid sample exhibits an onset potential of 0.890 V and a half-wave potential of 0.730 V, which is very close to the ORR performance of BNC sample we prepared ( $E_{\text{onset}} = 0.877$  V;  $E_{1/2} = 0.757$  V).

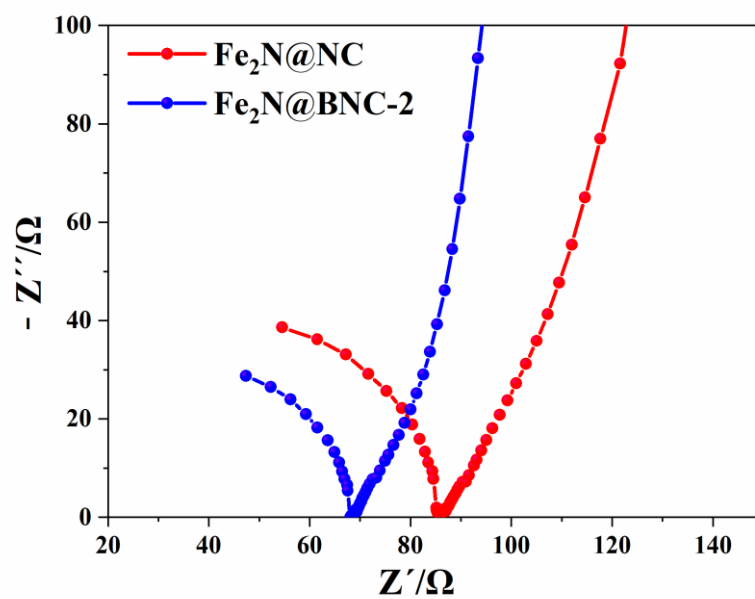

**Fig. S10** Electrochemical impedance spectra of Fe<sub>2</sub>N@NC and Fe<sub>2</sub>N@BNC-2 in oxygen-saturated 0.1 M KOH solution.

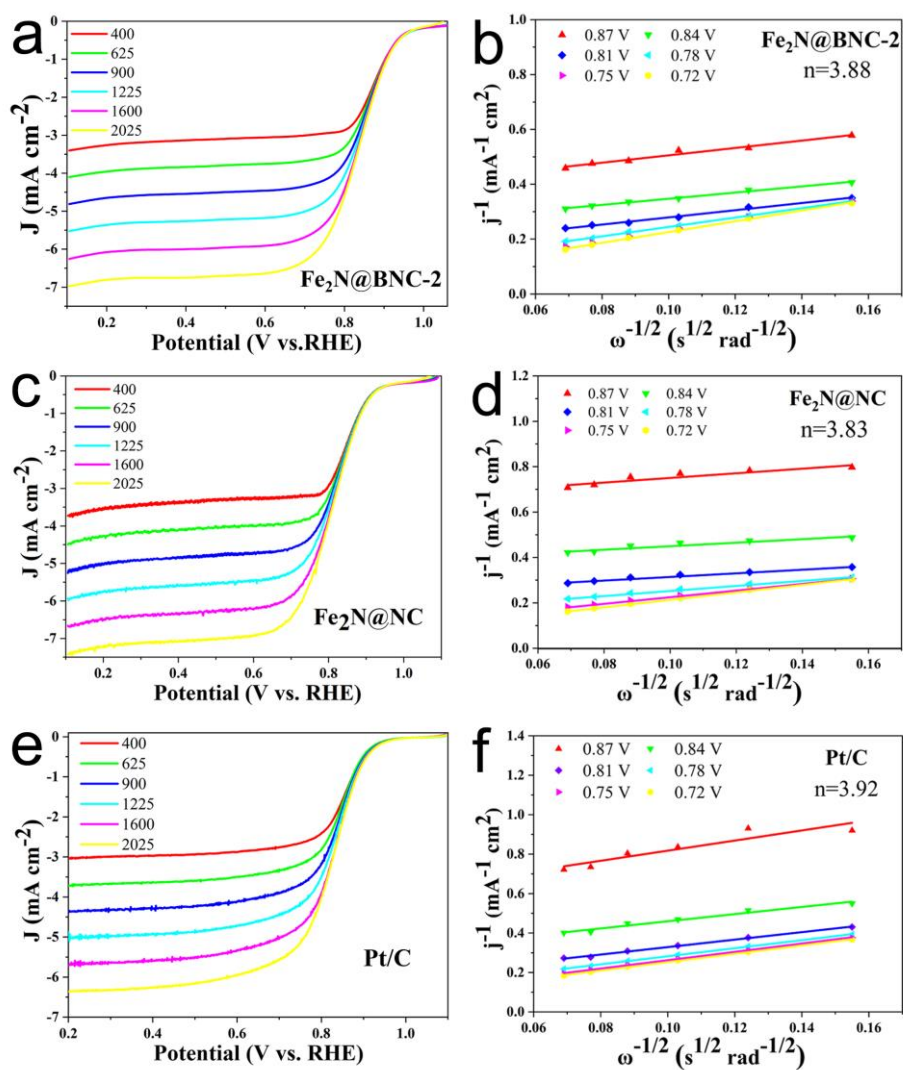

**Fig. S11** LSV curves with various rotation rates and corresponding K-L plots ( $j^{-1}$  vs.  $\omega^{-1/2}$ ) at different potentials of Fe<sub>2</sub>N@BNC-2 (a, b), Fe<sub>2</sub>N@NC (c, d) and commercial Pt/C (e, f) in 0.1 M KOH electrolyte.

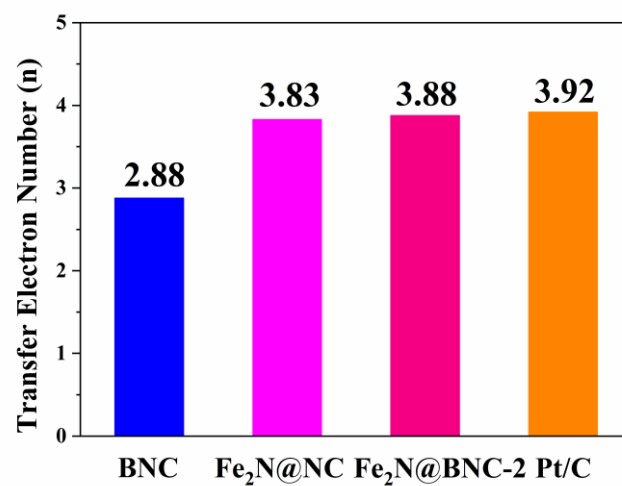

**Fig. S12** The K-L formula calculates the transfer electron number (n) for BNC, Fe<sub>2</sub>N@NC, Fe<sub>2</sub>N@BNC-2, and Pt/C (20 wt%).

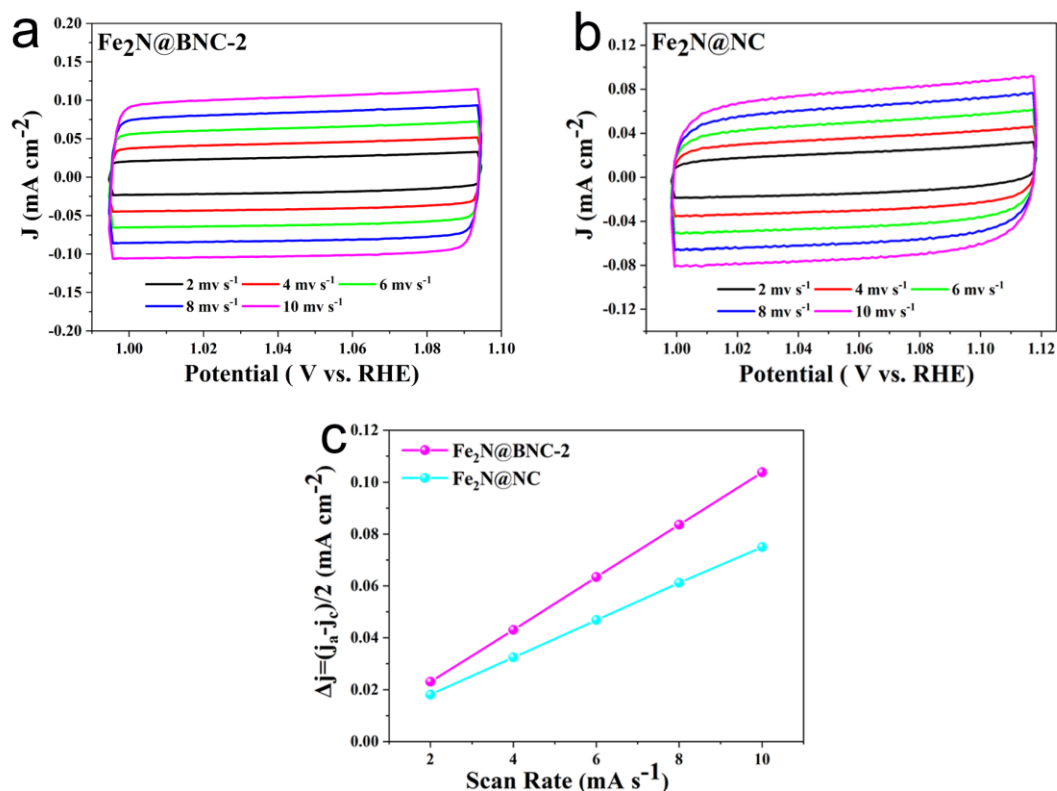

**Fig. S13** (a, b) CV curves of Fe<sub>2</sub>N@BNC-2 and Fe<sub>2</sub>N@NC as a function of the pyrolysis temperature at various scan rates within a non-Faraday potential window (1 V-1.1 V). (c) Linear fitting of capacitive currents of catalysts vs. scan rate.

The electrochemical active surface area (ECSA) is determined via Formula (1), where the double layer capacitance ( $C_{dl}$ ) value was estimated by the linear slope of the fitted line which was plotted by capacitive currents versus scan rates, and the  $C_s$  value is adopted as  $\approx 0.04 \text{ mF cm}^{-2}$ .

$$ECSA = \frac{C_{dl}}{C_s} \quad (1)$$

The ECSA of Fe<sub>2</sub>N@BNC-2 and Fe<sub>2</sub>N@NC is calculated to be 252.5 and 178.0 cm<sup>2</sup>, respectively, further confirming the higher activity of Fe<sub>2</sub>N@BNC-2.

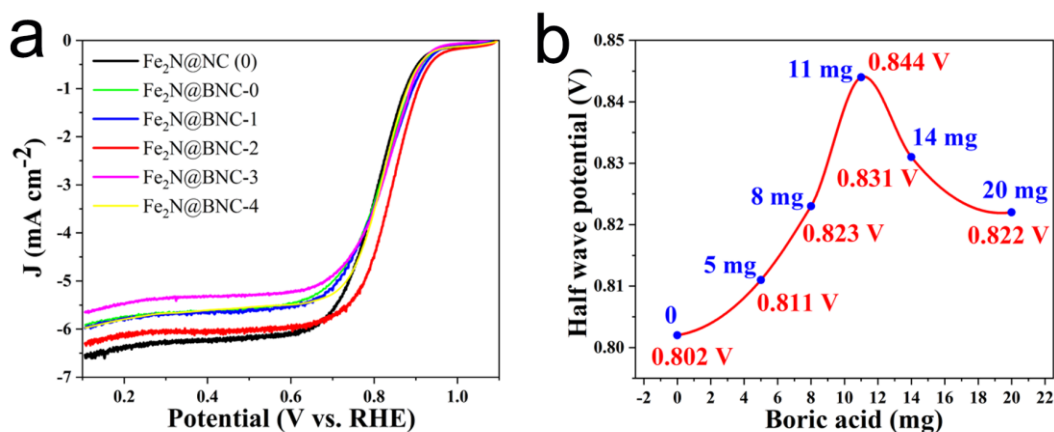

**Fig. S14** (a) The polarization curves of  $\text{Fe}_2\text{N@NC}$ ,  $\text{Fe}_2\text{N@BNC-0}$ ,  $\text{Fe}_2\text{N@BNC-1}$ ,  $\text{Fe}_2\text{N@BNC-2}$ ,  $\text{Fe}_2\text{N@BNC-3}$  and  $\text{Fe}_2\text{N@BNC-4}$  loaded on GC in a  $\text{O}_2$ -saturated 0.1 M KOH solution at a  $5 \text{ mV s}^{-1}$  scan rate and a rotation rate of 1600 rpm. (b) Half-wave potential of catalysts with different boron precursor content, the corresponding relationship with Figure a is as follows:  $\text{Fe}_2\text{N@NC}$  (No boron),  $\text{Fe}_2\text{N@BNC-0}$  (5 mg),  $\text{Fe}_2\text{N@BNC-1}$  (8 mg),  $\text{Fe}_2\text{N@BNC-2}$  (11 mg),  $\text{Fe}_2\text{N@BNC-3}$  (14 mg),  $\text{Fe}_2\text{N@BNC-4}$  (20 mg).

Half-wave potential of catalysts with different atomic ratio of boron, the corresponding relationship with Figure 3f are as follows:  $\text{Fe}_2\text{N@NC}$  (No boron),  $\text{Fe}_2\text{N@BNC-1}$  (1.00 at %),  $\text{Fe}_2\text{N@BNC-2}$  (1.22 at %),  $\text{Fe}_2\text{N@BNC-3}$  (3.16 at %). N content of catalysts with different atomic ratio of boron, the corresponding relationship in Figure 3f are as follows:  $\text{Fe}_2\text{N@NC}$  (0.45 at %),  $\text{Fe}_2\text{N@BNC-1}$  (1.33 at %),  $\text{Fe}_2\text{N@BNC-2}$  (3.02 at %),  $\text{Fe}_2\text{N@BNC-3}$  (2.78 at %). The relationship between C-N-B content in wrapped layer and atomic ratio of boron as follows:  $\text{Fe}_2\text{N@NC}$  (No C-N-B),  $\text{Fe}_2\text{N@BNC-1}$  (30.1 %),  $\text{Fe}_2\text{N@BNC-2}$  (35.3 %),  $\text{Fe}_2\text{N@BNC-3}$  (26.1 %).

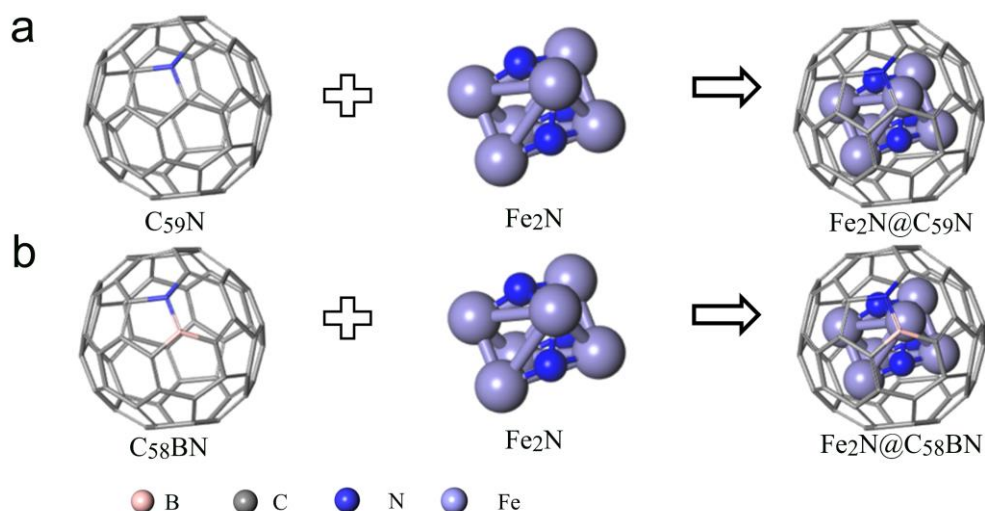

**Fig. S15** The optimized structure of  $\text{Fe}_2\text{N}@C_{59}\text{N}$  (a) and  $\text{Fe}_2\text{N}@C_{58}\text{BN}$  (b).

As shown in the Fig. S15, we have constructed  $\text{Fe}_2\text{N}@C_{59}\text{N}$  and  $\text{Fe}_2\text{N}@C_{58}\text{BN}$  catalyst models based on  $C_{60}$  and  $\text{Fe}_2\text{N}$  clusters. After optimizing the structure, it was found that the shell of the catalyst did not undergo major structural changes, indicating that the constructed model was stable. The bond lengths between the C, B, N atoms in the  $\text{Fe}_2\text{N}@C_{58}\text{BN}$  shell and the Fe atom in  $\text{Fe}_2\text{N}$  are 2.10, 2.05, and 1.98 Å, respectively. The bond lengths between C, N atoms in the shell of  $\text{Fe}_2\text{N}@C_{59}\text{N}$  and Fe atoms in  $\text{Fe}_2\text{N}$  are 1.94 and 1.97 Å.

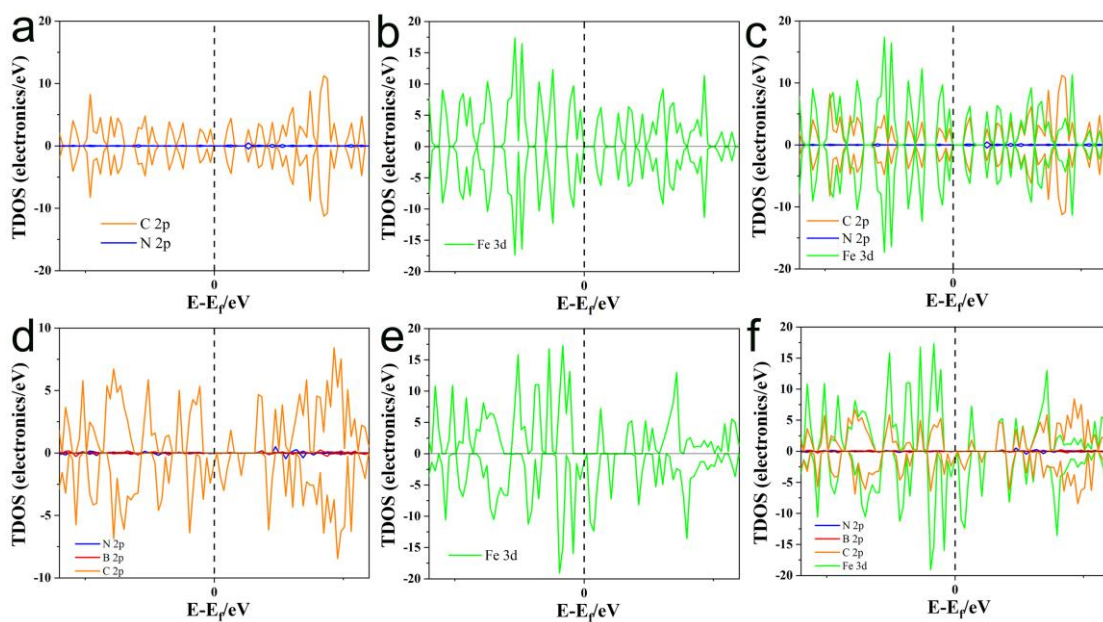

**Fig. S16** The projected density of states of  $\text{Fe}_2\text{N}@C_{59}\text{N}$  (a, b, c) and  $\text{Fe}_2\text{N}@C_{58}\text{BN}$  (d, e, f).

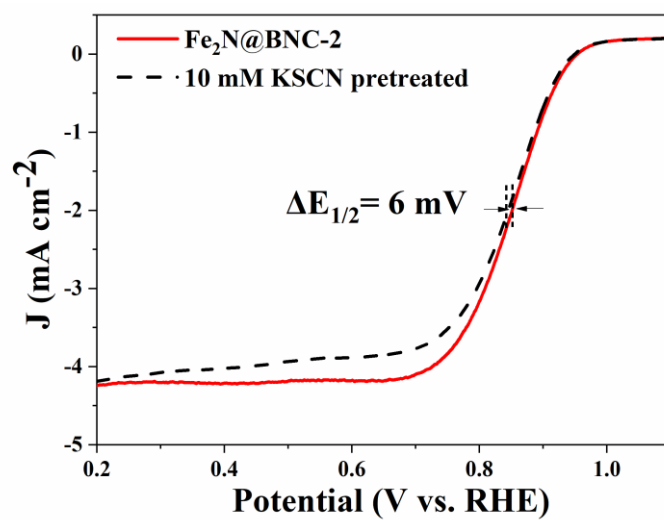

**Fig. S17** Effect of  $\text{SCN}^-$  on the ORR activity of  $\text{Fe}_2\text{N@BNC-2}$  in  $\text{O}_2$ -saturated 0.1 M KOH solution.

**Table S1.** The contents of Fe, C, O, N and B in samples.

| Samples                 | XPS composition (at %) |       |      |      |      |
|-------------------------|------------------------|-------|------|------|------|
|                         | Fe                     | C     | O    | N    | B    |
| Fe <sub>2</sub> N@BNC-1 | 0.52                   | 94.14 | 3.01 | 1.33 | 1.00 |
| Fe <sub>2</sub> N@BNC-2 | 0.38                   | 92.75 | 2.63 | 3.02 | 1.22 |
| Fe <sub>2</sub> N@NC    | 0.97                   | 95.06 | 3.15 | 0.82 | -    |

**Table S2.** Comparison of various ORR electrocatalysts in alkaline solution.

| Catalyst                                               | Onset potential<br>(V vs. RHE) | Half-wave<br>potential<br>(V vs. RHE) | Current<br>density at 0.3 V<br>(mA·cm <sup>-2</sup> ) | Years            | Ref.                    |
|--------------------------------------------------------|--------------------------------|---------------------------------------|-------------------------------------------------------|------------------|-------------------------|
| <b>Fe<sub>2</sub>N@BNC-2</b>                           | <b>0.981</b>                   | <b>0.844</b>                          | <b>6.06</b>                                           | <b>This work</b> | <b>This work</b>        |
| FeSe@NC-900 <sup>1</sup>                               | 0.970                          | 0.800                                 | 5.40                                                  | 2021             | J. Mater. Chem. A       |
| Co/CoO@NSC <sup>2</sup>                                | 0.975                          | 0.835                                 | 5.50                                                  | 2022             | J. Energy Chem.         |
| N-hG6 <sup>3</sup>                                     | 0.910                          | 0.833                                 | 5.28                                                  | 2020             | Carbon                  |
| Fe <sub>2</sub> N@NPC-500 <sup>4</sup>                 | 0.927                          | 0.790                                 | 4.85                                                  | 2017             | Nanoscale               |
| Co–N/CNTs-900 <sup>5</sup>                             | 0.908                          | 0.784                                 | 5.66                                                  | 2021             | J. Energy Chem.         |
| BN/C <sup>6</sup>                                      | 0.880                          | 0.800                                 | 5.25                                                  | 2020             | Carbon                  |
| Fe <sub>3</sub> C@C-900 <sup>7</sup>                   | 0.910                          | 0.800                                 | 5.28                                                  | 2017             | Carbon                  |
| BCN <sup>8</sup>                                       | 0.940                          | 0.820                                 | 5.50                                                  | 2017             | ACS. Energy Lett.       |
| Fe@C <sup>9</sup>                                      | 0.820                          | 0.712                                 | 4.50                                                  | 2016             | J. Am. Chem. Soc.       |
| CMN-231H <sup>10</sup>                                 | 0.945                          | 0.780                                 | 5.80                                                  | 2021             | Chem. Eng. J.           |
| Fe-Mn <sub>3</sub> O <sub>4</sub> HYSNBs <sup>11</sup> | 1.02                           | 0.780                                 | 5.85                                                  | 2022             | Chem. Eng. J.           |
| Fe <sub>x</sub> N/NGA <sup>12</sup>                    | 0.965                          | 0.815                                 | 5.78                                                  | 2014             | Adv. Funct. Mater.      |
| Fe <sub>1-x</sub> S@NSC-24 <sup>13</sup>               | 0.980                          | 0.700                                 | 5.05                                                  | 2021             | J. Energy Chem.         |
| MnO@FLC <sup>14</sup>                                  | 0.935                          | 0.813                                 | 5.38                                                  | 2016             | J. Mater. Chem. A       |
| M <sub>3</sub> C-GNRs <sup>15</sup>                    | 0.950                          | 0.820                                 | 4.60                                                  | 2015             | ACS Nano                |
| Fe-N-C/HPC-NH <sub>3</sub> <sup>16</sup>               | 0.945                          | 0.803                                 | 6.01                                                  | 2019             | Nano Research           |
| Fe/N-CNTs <sup>17</sup>                                | 0.960                          | 0.810                                 | 5.05                                                  | 2016             | J. Mater. Chem. A       |
| B <sub>2</sub> NGFe <sub>2</sub> -800 <sup>18</sup>    | 0.980                          | 0.830                                 | 4.95                                                  | 2016             | Phys. Chem. Chem. Phys. |

## References

1. Y. Cao, S. Huang, Z. Peng, F. Yao, X. Li, Y. Liu, H. Huang and M. Wu, *J. Mater. Chem. A*, 2021, **9**, 3464-3471.
2. D. Zhou, H. Fu, J. Long, K. Shen and X. Gou, *J. Energy Chem.*, 2022, **64**, 385-394.
3. Y. Bian, H. Wang, J. Hu, B. Liu, D. Liu and L. Dai, *Carbon*, 2020, **162**, 66-73.
4. X. Huang, Z. Yang, B. Dong, Y. Wang, T. Tang and Y. Hou, *Nanoscale*, 2017, **9**, 8102-8106.
5. X. Wang, X. Xi, G. Huo, C. Xu, P. Sui, R. Feng, X.-Z. Fu and J.-L. Luo, *J. Energy Chem.*, 2021, **53**, 49-55.
6. R. Zhao, Q. Li, Z. Chen, V. Jose, X. Jiang, G. Fu, J.-M. Lee and S. Huang, *Carbon*, 2020, **164**, 398-406.
7. A. Kong, Y. Zhang, Z. Chen, A. Chen, C. Li, H. Wang and Y. Shan, *Carbon*, 2017, **116**, 606-614.
8. J. Wang, J. Hao, D. Liu, S. Qin, D. Portehault, Y. Li, Y. Chen and W. Lei, *ACS. Energy Lett.*, 2017, **2**, 306-312.
9. W. J. Jiang, L. Gu, L. Li, Y. Zhang, X. Zhang, L. J. Zhang, J. Q. Wang, J. S. Hu, Z. Wei and L. J. Wan, *J. Am. Chem. Soc.*, 2016, **138**, 3570-3578.
10. B. Chen, H. Miao, M. Yin, R. Hu, L. Xia, C. Zhang and J. Yuan, *Chem. Eng. J.*, 2021, **417**.
11. T. Li, Y. Hu, K. Liu, J. Yin, Y. Li, G. Fu, Y. Zhang and Y. Tang, *Chem. Eng. J.*, 2022, **427**.
12. H. Yin, C. Zhang, F. Liu and Y. Hou, *Adv. Funct. Mater.*, 2014, **24**, 2930-2937.
13. Z. Li, W. Wang, M. Zhou, B. He, W. Ren, L. Chen, W. Xu, Z. Hou and Y. Chen, *J. Energy Chem.*, 2021, **54**, 310-317.
14. H. Cheng, K. Xu, L. Xing, S. Liu, Y. Gong, L. Gu, L. Zhang and C. Wu, *J. Mater. Chem. A*, 2016, **4**, 11775-11781.
15. X. Fan, Z. Peng, R. Ye, H. Zhou and X. Guo, *ACS Nano*, 2015, **9**, 7407-7418.
16. X. Liu, H. Liu, C. Chen, L. Zou, Y. Li, Q. Zhang, B. Yang, Z. Zou and H. Yang, *Nano Research*, 2019, **12**, 1651-1657.
17. Y. Liu, H. Jiang, Y. Zhu, X. Yang and C. Li, *J. Mater. Chem. A*, 2016, **4**, 1694-1701.
18. H. Feng, L. Wang, L. Zhao, C. Tian, P. Yu and H. Fu, *Phys. Chem. Chem. Phys.*, 2016, **18**, 26572-26578.
